# Supplementary material for: Common salts directed the growth of metal-free horizontal SWNT arrays
Source: Royal Society of Chemistry journal article supplement (doi:10.1039/d2nr05361f), 2022-12-12
Supplement: d2nr05361f1.pdf [file d2nr05361f1.pdf]

## Common salts directed growth of metal-free horizontal SWNT arrays

Yi Yu, Xiaoyue Sun, Ran Du\*, Hongjie Zhang, Dayan Liu, Ying Wang, Xinyu Zhang, Wenyu Zhang, Shuchen Zhang, Jinjie Qian, Yue Hu\* and Shaoming Huang\*

### Growth of horizontal SWNT arrays on the ST-cut quartz substrate by normal gradually-heating method.

The pre-treatment of the substrate was the same as the rapid-nucleation method. A drop of 0.05 M NaCl ethanol solution was spin-coated onto the quartz. The system was first purged with 100 sccm Ar and 100 sccm H<sub>2</sub>, and then the quartz was heated to the growth temperature of 850 °C at a rate of 21.5 °C min<sup>-1</sup> for about 40 min. After that, 0.5 sccm ethylene was introduced into the furnace to grow SWNT arrays.

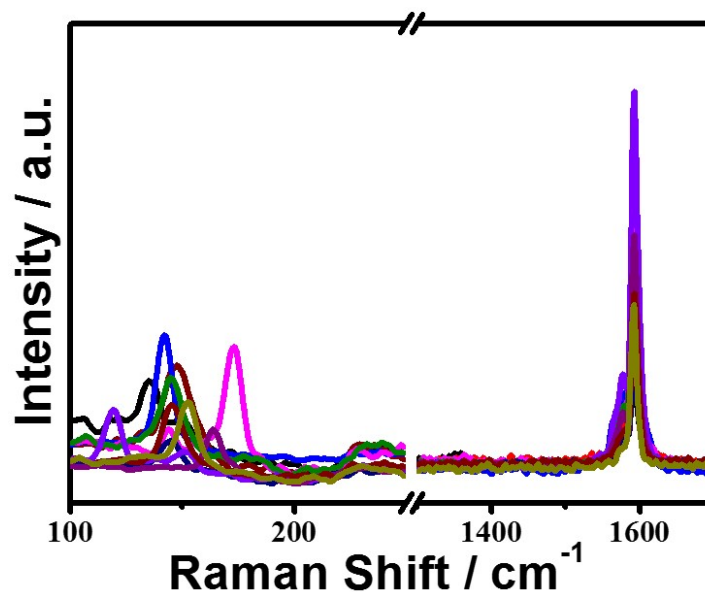

Fig. S1 Raman spectra of the multiple as-grown SWNTs.

## Supplementary Information

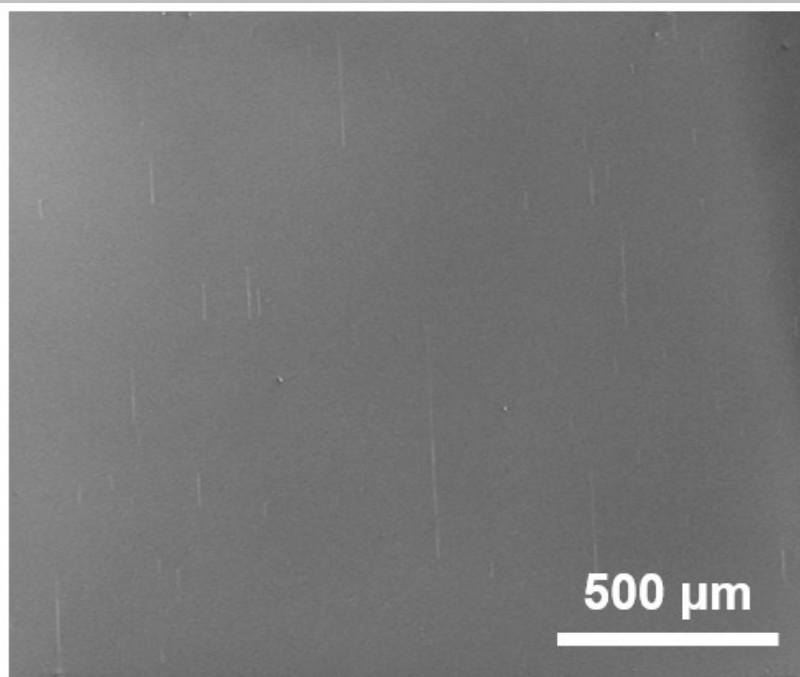

**Fig. S2** SEM image of SWNT arrays grown by normal gradually-heating method on quartz in large area.

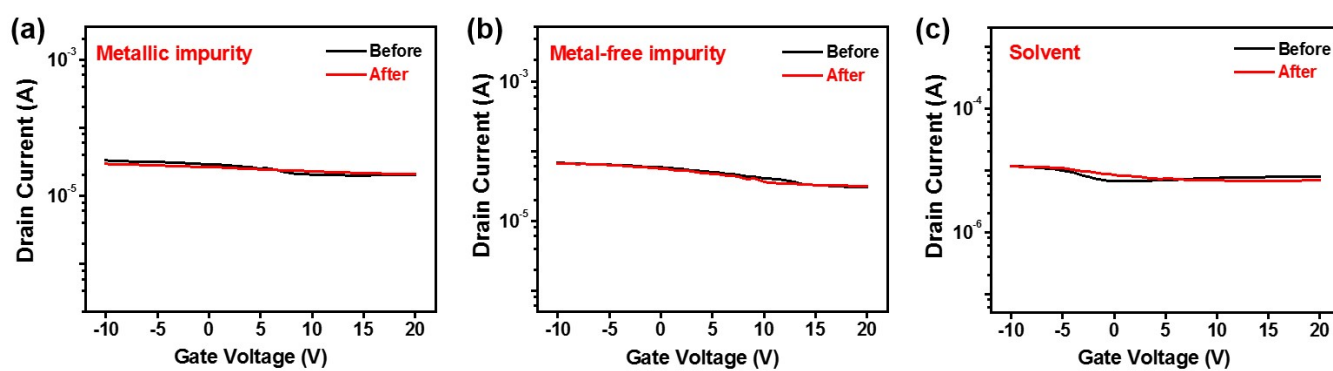

**Fig. S3** The  $I_{ds}-V_g$  curves of comparison at  $V_{ds}=1V$  between pristine metallic SWNT and after dealt with  $FeCl_3$  solution (a),  $NaCl$  solution (b) and alcohol (c).
